# Supplementary material for: Synbiotic Supplementation Modulates Gut Microbiota, Regulates Beta-Catenin Expression And Prevents Weight Gain in ob/ob Mice
Source: Research Square preprint supplement (doi:10.21203/rs.3.rs-655169/v2), 2021-11-23
Supplement: Supplementary file 1 [file c237559530037b3a45f7356a.docx]

**Supplementary Information**

**Additional file 1.** Nutritional composition of the Nuvilab CR-1 Autoclavable animal feed (Nuvital Nutrientes S/A, Colombo, Brazil).

| NUTRIENTS | CONCENTRATION/ KG OF PRODUCT |
| --- | --- |
| Protein (min.) | 220 g |
| Ethereal Extract (min.) | 40 g |
| Mineral Material (max.) | 90 g |
| Fibrous Matter (max.) | 70 g |
| Calcium (mín.- max.) | 10 - 14 g |
| Phosphor (min.) | 8.000 mg |
| Vitamin A | 25.200.00 UI |
| Vitamin D3 | 2.100.00 UI |
| Vitamin E | 60.00 mg |
| Vitamin K3 | 12.50 mg |
| Vitamin B1 | 14.40 mg |
| Vitamin B2 | 11.00 mg |
| Vitamin B6 | 12.00 mg |
| Vitamin B12 | 60.00 mcg |
| Niacin | 60.00 mg |
| Pantothenic acid | 112.00 mg |
| Folic acid | 6.00 mg |
| Biotin | 0.26 mg |
| Coline | 1.100.00 mg |
| Iron | 50.00 mg |
| Zinc | 60.00 mg |
| Copper | 10.00 mg |
| Iodine | 2.00 mg |
| Manganese | 60.00 mg |
| Selenium | 0.05 mg |
| Cobalt | 1.50 mg |
| Lysine | 100.00 mg |
| Methionine | 300.00 mg |

**Additional file 2.** Cadherin, occludin and zonulin (ZO-1) expression in the gut of animals: obese control (OC), obese treated (OT), lean control (LC) and lean treated (LT) groups.
